# Supplementary material for: Moscatilin Inhibits Metastatic Behavior of Human Hepatocellular Carcinoma Cells: A Crucial Role of uPA Suppression via Akt/NF-κB-Dependent Pathway
Source: MDPI journal article supplement (doi:10.3390/ijms22062930), 2021-03-13
Supplement: s1 [file s1]

## Supplementary Data

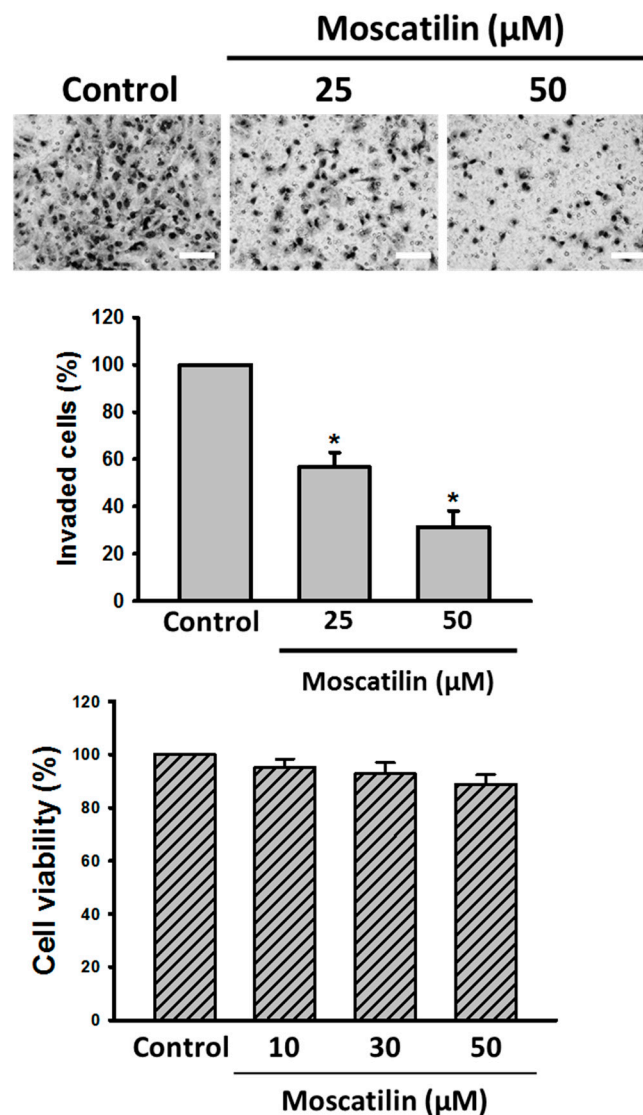

**Supplementary Figure S1. Effect of moscatilin on cell invasion in HA22T cells.** A, Cells were seeded onto the upper chamber coated with Matrigel, then treated without or with moscatilin (25, 50  $\mu\text{M}$ ) in medium containing 10% FBS as a chemoattractant in the lower chamber. B, HA22T cells were treated with the indicated concentrations of moscatilin in medium containing 10% FBS, and the cell viability was determined using MTT assay. Data are expressed as mean  $\pm$  S.E.M. of three independent experiments . \*  $p < 0.05$  compared the control group. Scale bar, 50  $\mu\text{m}$ .

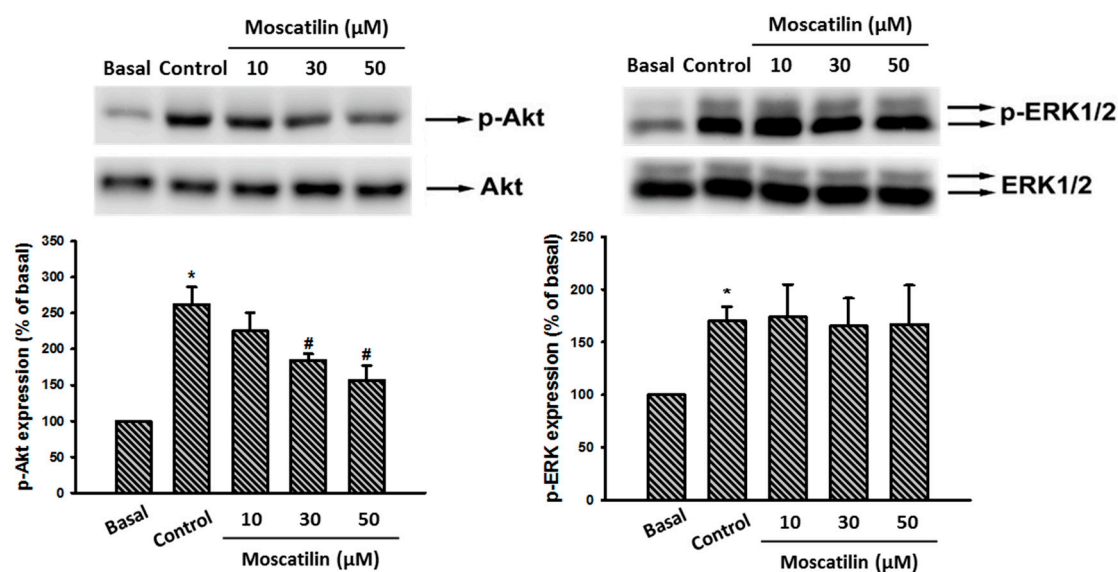

**Supplementary Figure S2. Effect of moscatilin on the phosphorylation of Akt and ERK in HA22T cells.** Serum-starved cells were treated with vehicle (basal) or 10% FBS in the absence (control) or presence the indicated agents for 10 min. Cells were harvested and lysed for the detection of p-Akt and p-ERK1/2 by Western blot analysis. The quantitative densitometry of the relative level of protein was performed with Image-Pro Plus. Data are expressed as mean  $\pm$  SEM of three independent experiments. \*  $p < 0.05$  compared with the basal group. #  $p < 0.05$  compared with the control group.

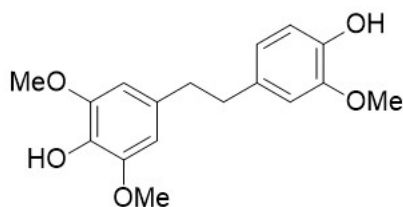

**Supplementary Figure S3. Structure of moscatilin.**
